# Supplementary material for: Coordination assemblies of the CdII–BDC/bpt mixed-ligand system: positional isomeric effect, structural diversification and luminescent properties
Source: Royal Society of Chemistry journal article supplement (doi:10.1039/c3ce26905a), 2013-01-01
Supplement: c3ce26905a.pdf [file c3ce26905a.pdf]

## Supplementary Material

# Coordination Assemblies of the Cd<sup>II</sup>-BDC/bpt Mixed-Ligand System: Positional Isomeric Effect, Structural Diversification and Luminescent Properties

Fu-Ping Huang,<sup>a,b</sup> Zu-Mei Yang,<sup>a</sup> Peng-Fei Yao,<sup>a</sup> Qing Yu,<sup>a</sup> Jin-Lei Tian,<sup>b</sup>  
He-Dong Bian,<sup>\*a</sup> Shi-Ping Yan,<sup>\*b</sup> Dai-Zheng Liao,<sup>b</sup> Peng Cheng<sup>b</sup>

<sup>a</sup> Key Laboratory for the Chemistry and Molecular Engineering of Medicinal Resources (Department Chemistry and Chemical Engineering, Guangxi Normal University), Ministry of Education of China, Guilin 541004, P. R. China.

<sup>b</sup> Department of Chemistry, Nankai University, Tianjin 300071, PR China

**Table S1. Selected bond distances (Å) and angles (°) for the complexes 1-6**

| complex 1 <sup>a</sup> |            |             |            |
|------------------------|------------|-------------|------------|
| Cd1–O4                 | 2.325 (10) | Cd2–O14     | 2.285 (12) |
| Cd1–N10A               | 2.325 (10) | Cd2–O15     | 2.370 (13) |
| Cd1–N1                 | 2.335 (12) | Cd3–N5B     | 2.312 (11) |
| Cd1–O13                | 2.352 (13) | Cd3–N6      | 2.320 (11) |
| Cd1–O2                 | 2.379 (11) | Cd3–O17     | 2.361 (11) |
| Cd1–O1                 | 2.429 (12) | Cd3–O9      | 2.367 (9)  |
| Cd1–O3                 | 2.568 (12) | Cd3–O11     | 2.396 (13) |
| Cd2–O16                | 2.09 (2)   | Cd3–O12     | 2.458 (14) |
| Cd2–O7                 | 2.195 (14) | Cd3–O10     | 2.500 (11) |
| Cd2–O5                 | 2.267 (10) |             |            |
| O4–Cd1–N10A            | 140.4 (4)  | O5–Cd2–O14  | 89.9 (4)   |
| O4–Cd1–N1              | 88.5 (4)   | O16–Cd2–O15 | 92.3 (8)   |
| N10A–Cd1–N1            | 88.8 (4)   | O7–Cd2–O15  | 92.5 (6)   |
| O4–Cd1–O13             | 92.1 (4)   | O5–Cd2–O15  | 172.3 (4)  |
| N10A–Cd1–O13           | 88.9 (4)   | O14–Cd2–O15 | 82.8 (4)   |
| N1–Cd1–O13             | 177.0 (5)  | N5B–Cd3–N6  | 90.3 (4)   |
| O4–Cd1–O2              | 81.3 (4)   | N5B–Cd3–O17 | 87.7 (4)   |
| N10A–Cd1–O2            | 138.3 (4)  | N6–Cd3–O17  | 173.7 (4)  |
| N1–Cd1–O2              | 92.3 (4)   | N5B–Cd3–O9  | 142.7 (4)  |
| O13–Cd1–O2             | 90.7 (5)   | N6–Cd3–O9   | 88.2 (4)   |
| O4–Cd1–O1              | 134.6 (4)  | O17–Cd3–O9  | 89.7 (4)   |
| N10A–Cd1–O1            | 84.9 (4)   | N5B–Cd3–O11 | 84.1 (5)   |
| N1–Cd1–O1              | 91.9 (4)   | N6–Cd3–O11  | 92.1 (5)   |
| O13–Cd1–O1             | 89.8 (5)   | O17–Cd3–O11 | 93.7 (5)   |
| O2–Cd1–O1              | 53.3 (4)   | O9–Cd3–O11  | 133.2 (4)  |
| O4–Cd1–O3              | 53.2 (3)   | N5B–Cd3–O12 | 136.9 (5)  |
| N10A–Cd1–O3            | 87.7 (4)   | N6–Cd3–O12  | 93.4 (4)   |

|             |           |             |           |
|-------------|-----------|-------------|-----------|
| N1–Cd1–O3   | 94.2 (4)  | O17–Cd3–O12 | 92.1 (4)  |
| O13–Cd1–O3  | 83.8 (5)  | O9–Cd3–O12  | 80.4 (4)  |
| O2–Cd1–O3   | 133.7 (4) | O11–Cd3–O12 | 52.8 (5)  |
| O1–Cd1–O3   | 170.3 (4) | N5B–Cd3–O10 | 89.5 (4)  |
| O16–Cd2–O7  | 138.3 (8) | N6–Cd3–O10  | 91.8 (4)  |
| O16–Cd2–O5  | 89.3 (7)  | O17–Cd3–O10 | 82.2 (4)  |
| O7–Cd2–O5   | 91.3 (5)  | O9–Cd3–O10  | 53.4 (3)  |
| O16–Cd2–O14 | 120.4 (8) | O11–Cd3–O10 | 172.5 (4) |
| O7–Cd2–O14  | 101.2 (5) | O12–Cd3–O10 | 133.2 (4) |

complex **2**<sup>b</sup>

|             |             |            |            |
|-------------|-------------|------------|------------|
| Cd1–O4A     | 2.201 (3)   | Cd1–N1     | 2.351 (3)  |
| Cd1–O3      | 2.293 (2)   | Cd1–O1     | 2.353 (2)  |
| Cd1–N5B     | 2.297 (3)   | Cd1–O2     | 2.440 (2)  |
| O4A–Cd1–O3  | 126.59 (10) | N5B–Cd1–O1 | 92.64 (10) |
| O4A–Cd1–N5B | 101.11 (11) | N1–Cd1–O1  | 83.66 (10) |
| O3–Cd1–N5B  | 86.50 (10)  | O4A–Cd1–O2 | 88.83 (9)  |
| O4A–Cd1–N1  | 87.30 (11)  | O3–Cd1–O2  | 142.35 (9) |
| O3–Cd1–N1   | 84.09 (10)  | N5B–Cd1–O2 | 99.94 (10) |
| N5B–Cd1–N1  | 169.98 (10) | N1–Cd1–O2  | 85.55 (10) |
| O4A–Cd1–O1  | 142.85 (9)  | O1–Cd1–O2  | 54.65 (8)  |
| O3–Cd1–O1   | 88.23 (9)   |            |            |

complex **3**<sup>c</sup>

|         |           |          |           |
|---------|-----------|----------|-----------|
| Cd1–O2  | 2.298 (5) | Cd2–O1   | 2.302 (6) |
| Cd1–O8A | 2.332 (6) | Cd2–N6   | 2.329 (6) |
| Cd1–N5B | 2.337 (6) | Cd2–O4B  | 2.333 (5) |
| Cd1–N1  | 2.341 (6) | Cd2–N10C | 2.354 (6) |
| Cd1–O3B | 2.371 (5) | Cd2–O5   | 2.359 (5) |
| Cd1–O7A | 2.445 (6) | Cd2–O6   | 2.463 (5) |
| Cd1–O1  | 2.568 (6) | Cd2–O3B  | 2.495 (5) |

|             |             |              |             |
|-------------|-------------|--------------|-------------|
| O2–Cd1–O8A  | 140.1 (2)   | O1–Cd2–N6    | 83.5 (2)    |
| O2–Cd1–N5B  | 99.1 (2)    | O1–Cd2–O4B   | 126.81 (19) |
| O8A–Cd1–N5B | 88.0 (2)    | N6–Cd2–O4B   | 88.6 (2)    |
| O2–Cd1–N1   | 89.4 (2)    | O1–Cd2–N10C  | 95.4 (2)    |
| O8A–Cd1–N1  | 90.2 (2)    | N6–Cd2–N10C  | 176.8 (2)   |
| N5B—Cd1—N1  | 168.8 (2)   | O4B—Cd2—N10C | 94.5 (2)    |
| O2–Cd1–O3B  | 123.46 (19) | O1–Cd2–O5    | 95.57 (19)  |
| O8A–Cd1–O3B | 95.77 (19)  | N6–Cd2–O5    | 88.5 (2)    |
| N5B–Cd1–O3B | 88.1 (2)    | O4B–Cd2–O5   | 136.83 (19) |
| N1—Cd1—O3B  | 81.0 (2)    | N10C—Cd2—O5  | 88.6 (2)    |
| O2–Cd1–O7A  | 85.88 (19)  | O1–Cd2–O6    | 149.54 (17) |
| O8A–Cd1–O7A | 54.35 (19)  | N6–Cd2–O6    | 93.6 (2)    |
| N5B–Cd1–O7A | 94.7 (2)    | O4B–Cd2–O6   | 83.26 (18)  |
| N1–Cd1–O7A  | 93.2 (2)    | N10C–Cd2–O6  | 85.8 (2)    |
| O3B–Cd1–O7A | 149.76 (18) | O5–Cd2–O6    | 53.99 (17)  |
| O2–Cd1–O1   | 53.02 (18)  | O1–Cd2–O3B   | 73.99 (18)  |
| O8A–Cd1–O1  | 166.80 (19) | N6–Cd2–O3B   | 91.4 (2)    |
| N5B–Cd1–O1  | 88.0 (2)    | O4B–Cd2–O3B  | 53.64 (18)  |
| N1–Cd1–O1   | 91.3 (2)    | N10C–Cd2–O3B | 91.3 (2)    |
| O3B–Cd1–O1  | 71.53 (17)  | O5–Cd2–O3B   | 169.50 (17) |
| O7A–Cd1–O1  | 138.58 (18) | O6–Cd2–O3B   | 136.47 (16) |

---

complex **4**<sup>d</sup>

---

|             |            |            |            |
|-------------|------------|------------|------------|
| Cd1–O4A     | 2.245 (2)  | Cd1–O2     | 2.342 (2)  |
| Cd1–O5      | 2.317 (2)  | Cd1–N1     | 2.350 (3)  |
| Cd1–N5B     | 2.331 (3)  | Cd1–O1     | 2.493 (2)  |
| O4A–Cd1–O5  | 133.70 (8) | N5B–Cd1–N1 | 167.46(8)  |
| O4A–Cd1–N5B | 94.91 (10) | O2–Cd1–N1  | 90.89 (10) |
| O5–Cd1–N5B  | 85.45 (9)  | O4A–Cd1–O1 | 139.59 (8) |
| O4A–Cd1–O2  | 85.78 (8)  | O5–Cd1–O1  | 86.65 (8)  |

|                        |             |             |             |
|------------------------|-------------|-------------|-------------|
| O5–Cd1–O2              | 140.50 (8)  | N5B–Cd1–O1  | 84.65 (8)   |
| N5B–Cd1–O2             | 90.41 (10)  | O2–Cd1–O1   | 53.85 (7)   |
| O4A–Cd1–N1             | 97.63 (10)  | N1–Cd1–O1   | 85.84 (8)   |
| O5–Cd1–N1              | 85.61 (9)   |             |             |
| complex 5 <sup>e</sup> |             |             |             |
| Cd1–N1                 | 2.320 (5)   | Cd1–O5      | 2.415 (5)   |
| Cd1–N5A                | 2.330 (5)   | Cd1–O4B     | 2.478 (5)   |
| Cd1–O1                 | 2.338 (5)   | Cd1–O2      | 2.506 (5)   |
| Cd1–O3B                | 2.368 (4)   |             |             |
| N1–Cd1–N5A             | 164.86 (18) | N5A–Cd1–O4B | 87.63 (17)  |
| N1–Cd1–O1              | 89.52 (18)  | O1–Cd1–O4B  | 142.54 (15) |
| N5A–Cd1–O1             | 96.76 (18)  | O3B–Cd1–O4B | 53.50 (15)  |
| N1–Cd1–O3B             | 93.65 (17)  | O5–Cd1–O4B  | 76.88 (16)  |
| N5A–Cd1–O3B            | 100.18 (17) | N1–Cd1–O2   | 88.81 (17)  |
| O1–Cd1–O3B             | 89.22 (16)  | N5A–Cd1–O2  | 83.81 (17)  |
| N1–Cd1–O5              | 83.67 (18)  | O1–Cd1–O2   | 54.13 (15)  |
| N5A–Cd1–O5             | 82.74 (18)  | O3B–Cd1–O2  | 143.27 (16) |
| O1–Cd1–O5              | 140.57 (17) | O5–Cd1–O2   | 86.84 (17)  |
| O3B–Cd1–O5             | 129.86 (17) | O4B–Cd1–O2  | 162.46 (14) |
| N1–Cd1–O4B             | 95.76 (18)  |             |             |
| complex 6 <sup>f</sup> |             |             |             |
| Cd1–N5A                | 2.318 (14)  | Cd1–O6      | 2.417 (14)  |
| Cd1–N1                 | 2.322 (13)  | Cd1–O2      | 2.470 (12)  |
| Cd1–O4B                | 2.386 (14)  | Cd1–O3B     | 2.640 (17)  |
| Cd1–O1                 | 2.397 (12)  |             |             |
| N5A–Cd1–N1             | 173.1 (5)   | N1–Cd1–O2   | 93.6 (4)    |
| N5A–Cd1–O4B            | 86.9 (5)    | O4B–Cd1–O2  | 165.6 (4)   |
| N1–Cd1–O4B             | 91.7 (5)    | O1–Cd1–O2   | 53.3 (4)    |
| N5A–Cd1–O1             | 94.5 (5)    | O6–Cd1–O2   | 97.8 (4)    |

|            |           |             |           |
|------------|-----------|-------------|-----------|
| N1–Cd1–O1  | 90.9 (5)  | N5A–Cd1–O3B | 99.1 (5)  |
| O4B–Cd1–O1 | 140.0 (5) | N1–Cd1–O3B  | 85.2 (5)  |
| N5A–Cd1–O6 | 88.5 (5)  | O4B–Cd1–O3B | 51.4 (5)  |
| N1–Cd1–O6  | 84.7 (5)  | O1–Cd1–O3B  | 89.1 (5)  |
| O4B–Cd1–O6 | 69.4 (5)  | O6–Cd1–O3B  | 119.4 (5) |
| O1–Cd1–O6  | 150.5 (5) | O2–Cd1–O3B  | 142.4 (4) |
| N5A–Cd1–O2 | 86.2 (5)  |             |           |

<sup>a</sup> Symmetry codes: (A)  $-x+1, -y+2, -z+2$ ; (B)  $-x+1, -y+2, -z+1$ . <sup>b</sup> Symmetry codes: (A)  $-x+1, -y+2, -z+1$ ; (B)  $x+1, y, z+1$ . <sup>c</sup> Symmetry codes: (A)  $x+1, -y+1/2, z+1/2$ ; (B)  $x, -y+1/2, z+1/2$ ; (C)  $x, -y+1/2, z-1/2$ . <sup>d</sup> Symmetry codes: (A)  $x-1, y+1, z$ ; (B)  $-x, -y, -z+1$ . <sup>e</sup> Symmetry codes: A:  $-x+2, -y, -z+2$ ; B:  $-x+3/2, y-1/2, -z+3/2$ . <sup>f</sup> Symmetry codes: (A)  $-x, y+1/2, -z+1/2$ ; (B)  $x, -y+1/2, z+1/2$ .

**Table S2. Selected geometrical parameters of hydrogen bonds in the complexes 2, 3, 5, 6.**

| $D-H\cdots A$                           | $D-H$   | $H\cdots A$ | $D\cdots A$ | $D-H\cdots A$ |
|-----------------------------------------|---------|-------------|-------------|---------------|
| <b>Complex 2</b>                        |         |             |             |               |
| N3—H3A $\cdots$ O2 <sup>i</sup>         | 0.94(6) | 1.82(6)     | 2.739(4)    | 166(5)        |
| Symmetry codes: (i): $-x+1, -y+2, -z$ . |         |             |             |               |
| <b>Complex 3</b>                        |         |             |             |               |
| N3—H3A $\cdots$ O11 <sup>i</sup>        | 0.78    | 2.02        | 2.776 (11)  | 165           |
| N8—H8A $\cdots$ O6 <sup>ii</sup>        | 0.89    | 1.89        | 2.756 (8)   | 165           |
| O9—H9A $\cdots$ O12                     | 0.85    | 2.55        | 3.38 (6)    | 164           |
| O10—H10A $\cdots$ O4 <sup>iii</sup>     | 0.85    | 2.17        | 3.018(19)   | 178           |
| O10—H10B $\cdots$ O13 <sup>iv</sup>     | 0.79    | 2.22        | 2.81 (7)    | 132           |
| O11—H11A $\cdots$ O7 <sup>ii</sup>      | 0.83    | 1.97        | 2.796(12)   | 179           |
| O11—H11B $\cdots$ N3 <sup>v</sup>       | 0.83    | 1.95        | 2.796(11)   | 180           |
| O12—H12B $\cdots$ O13                   | 0.71    | 2.33        | 2.84 (9)    | 131           |
| O14—H14A $\cdots$ O2                    | 0.91    | 1.86        | 2.77 (3)    | 176           |

Symmetry codes: (i)  $x, y-1, z-1$ ; (ii)  $-x, -y, -z$ ; (iii)  $x+1, y, z+1$ ; (iv)  $-x+1, -y-1, -z+1$ ; (v)  $x, y+1, z+1$ .

---

**Complex 5**

|                            |      |      |            |     |
|----------------------------|------|------|------------|-----|
| N3—H3...O4 <sup>i</sup>    | 0.92 | 1.83 | 2.687 (7)  | 155 |
| O5—H5A...O6 <sup>ii</sup>  | 0.85 | 2.13 | 2.758 (9)  | 130 |
| O5—H5B...N4 <sup>iii</sup> | 0.86 | 2.44 | 2.910 (7)  | 115 |
| O6—H6A...O2 <sup>iv</sup>  | 0.85 | 1.94 | 2.785 (7)  | 178 |
| O6—H6B...N2 <sup>v</sup>   | 0.87 | 2.17 | 3.042 (9)  | 180 |
| O7—H7A...N9 <sup>vi</sup>  | 0.86 | 2.10 | 2.959 (10) | 179 |
| O7—H7B...N7                | 0.85 | 2.10 | 2.953 (9)  | 179 |
| N8—H8...O8                 | 0.96 | 1.73 | 2.674 (9)  | 169 |
| O8—H8A...N6 <sup>vii</sup> | 0.86 | 1.91 | 2.775 (11) | 178 |
| O8—H8B...O4 <sup>vi</sup>  | 0.87 | 2.46 | 3.315 (10) | 167 |
| O9—H9A...O6 <sup>vii</sup> | 0.85 | 2.07 | 2.924 (17) | 180 |
| O9—H9B...O7 <sup>vi</sup>  | 0.85 | 2.21 | 3.065 (17) | 179 |

Symmetry codes: (i)  $-x+1, -y, -z+1$ ; (ii)  $x+1, y, z$ ; (iii)  $x, y-1, z$ ; (iv)  $-x+3/2, y+1/2, -z+5/2$ ; (v)  $x-1, y, z$ ; (vi)  $-x, -y, -z+1$ ; (vii)  $x, y+1, z$ .

---

**Complex 6**

|                           |      |      |          |     |
|---------------------------|------|------|----------|-----|
| N3—H3...O5 <sup>i</sup>   | 0.89 | 1.85 | 2.75(2)  | 179 |
| O5—H5C...O1 <sup>ii</sup> | 0.85 | 1.95 | 2.80 (2) | 180 |
| O5—H5D...O2               | 0.85 | 1.89 | 2.74 (2) | 180 |

Symmetry codes: (i)  $-x+1, y+1/2, -z+3/2$ ; (ii)  $x+1, y, z$ .

---

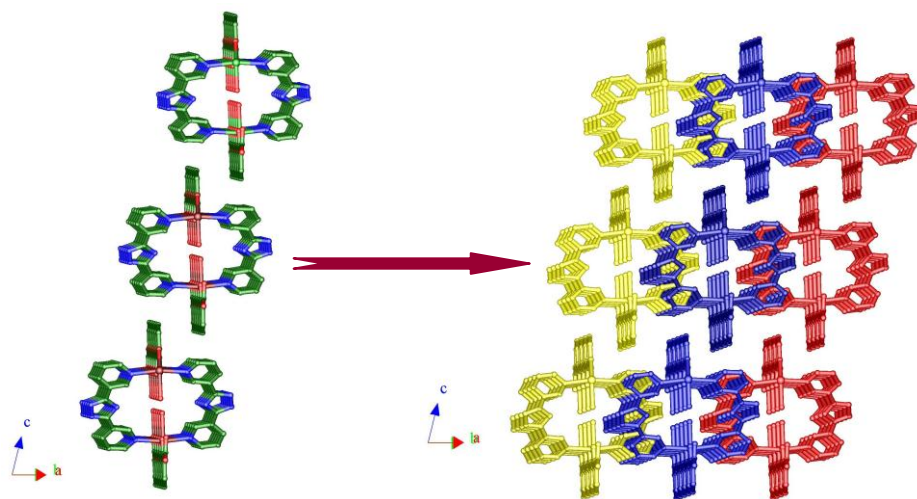

Figure S1. Molecular packing by  $\pi\cdots\pi$  interaction viewed in the *ac* plane.

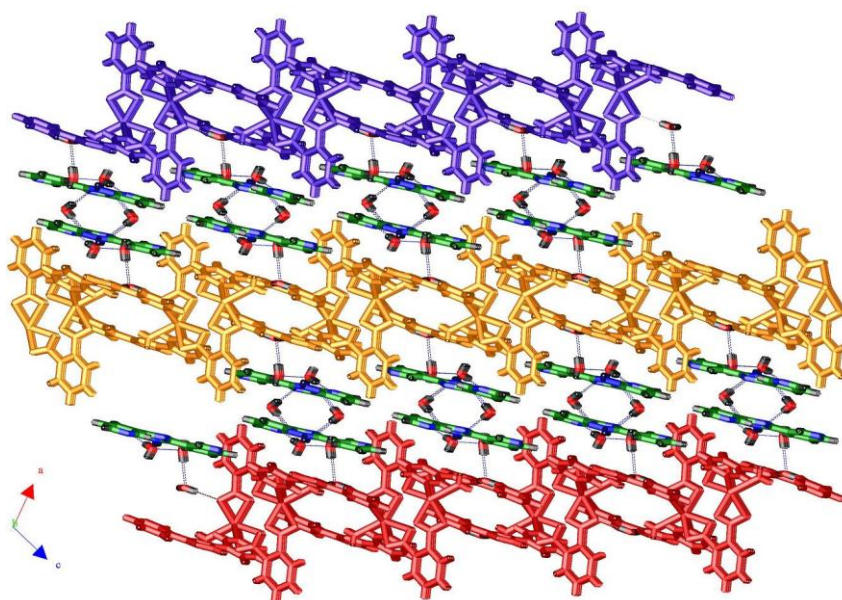

Figure S2. The 3D supra-molecular network along the *ac* plane.

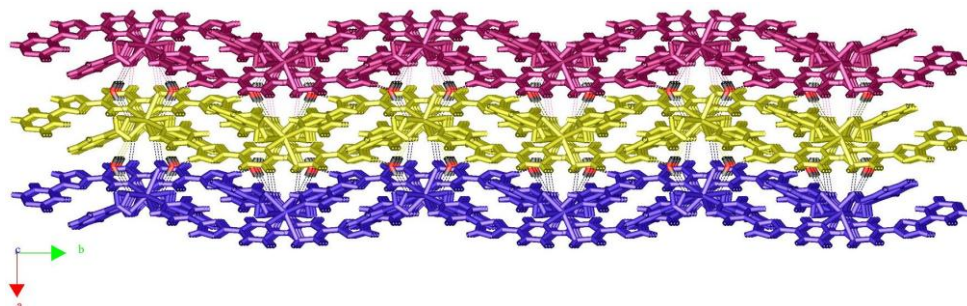

Figure S3. The extended 3D network viewed along the *ab* plane.



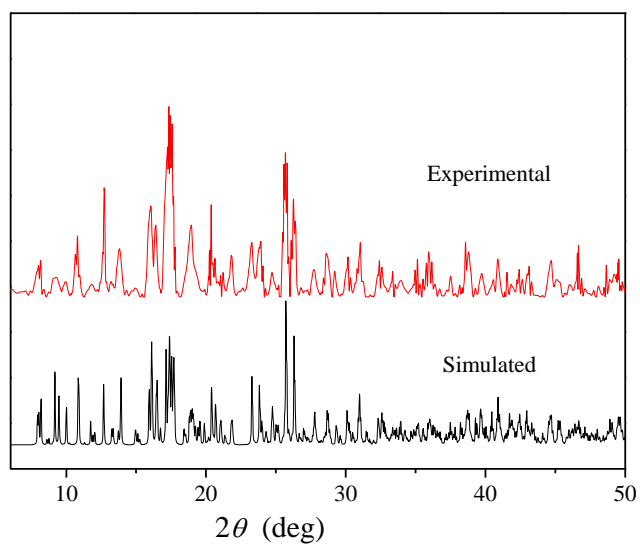

Figure S4. Measured and calculated powder X-ray diffraction (PXRD) pattern of **1**.

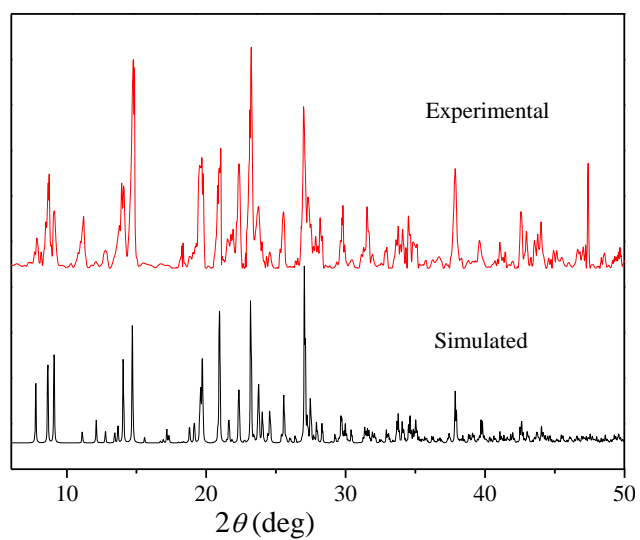

Figure S5. Measured and calculated powder X-ray diffraction (PXRD) pattern of **2**.

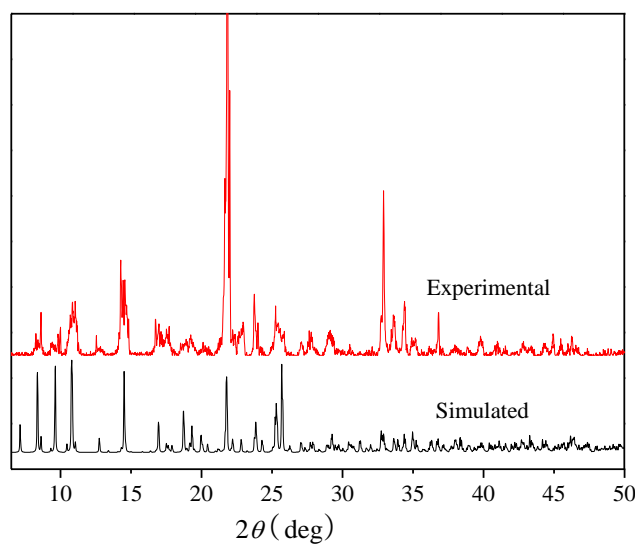

Figure S6. Measured and calculated powder X-ray diffraction (PXRD) pattern of **3**.

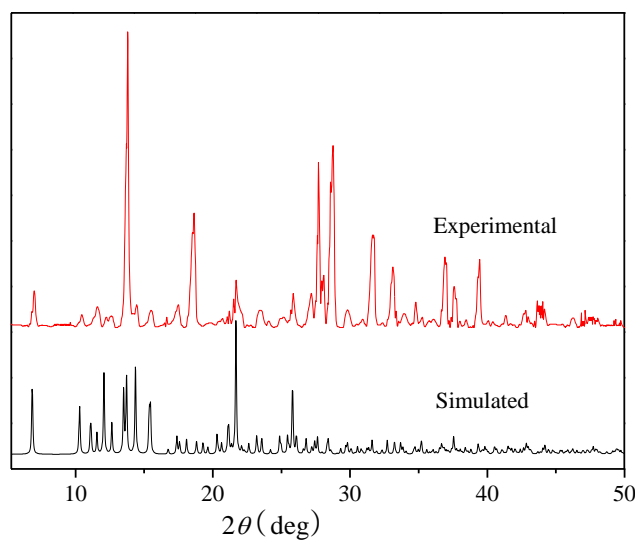

Figure S7. Measured and calculated powder X-ray diffraction (PXRD) pattern of **4**.

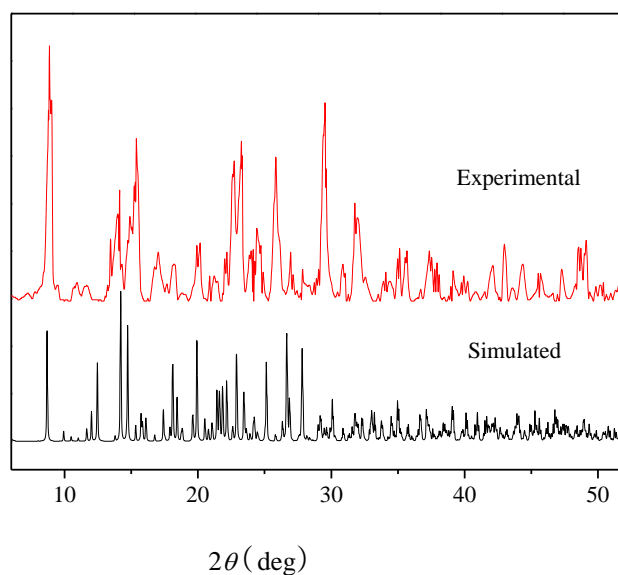

Figure S8. Measured and calculated powder X-ray diffraction (PXRD) pattern of **5**.

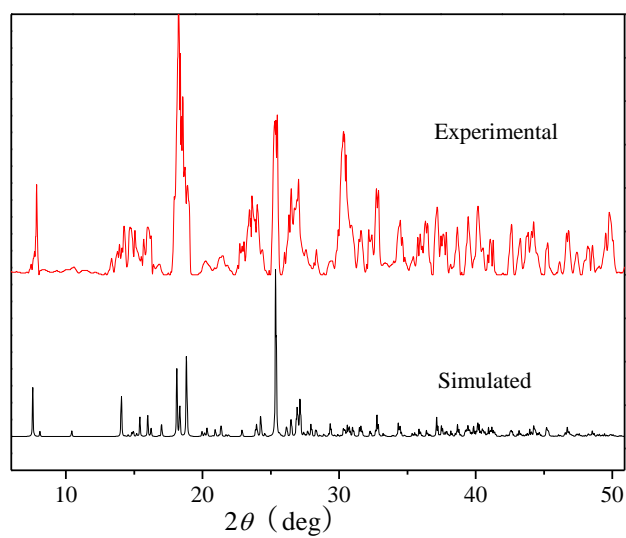

Figure S9. Measured and calculated powder X-ray diffraction (PXRD) pattern of **6**.
